# Supplementary material
Source: Springer Nature journal article supplement (https://www.springermedizin.de/resource/supplementary/13223_2014_500_MOESM6_ESM.pdf/9596658)
Supplement: MOESM6 [file 9596658]

| Associations with phenotype                                                                                                        |
|------------------------------------------------------------------------------------------------------------------------------------|
| <b>Asthma</b>                                                                                                                      |
| Immune response: <i>FOXP3(67)</i> , <i>INF-g(67)</i> , <i>STAT5A(68)</i> , <i>CRIP1(68)</i> , <i>IL-4R(69)</i>                     |
| NO synthesis: <i>ARG2(70)</i>                                                                                                      |
| Lipid pathway: <i>ALOX12(71)</i> , <i>ASCL3(72)</i>                                                                                |
| Pharmacologic receptor: <i>ADRB2(73)</i>                                                                                           |
| <b>Atopy</b>                                                                                                                       |
| Immune response: <i>TLSP(74)</i>                                                                                                   |
| Lipid pathway: <i>PTGDR(75)</i>                                                                                                    |
| Xenobiotics: <i>CYP26A1(76)</i>                                                                                                    |
| Various: <i>58 genes (77)</i>                                                                                                      |
| Associations with environmental exposure                                                                                           |
| <b>Tobacco smoke</b>                                                                                                               |
| Immune response: <i>TGFB3(78)</i>                                                                                                  |
| Xenobiotic metabolism: <i>AHRR(79)</i> , <i>CYP1A1(79)</i>                                                                         |
| Signaling: <i>NPSR1(80)</i> , <i>GFI1(79)</i> , <i>PTPRO(78)</i>                                                                   |
| Oncogenes: <i>SPDEF(78)</i> , <i>SNCG(78)</i> , <i>AXL(78)</i> , <i>MET(78)</i> , <i>NBL1(78)</i> , <i>KLK11(78)</i>               |
| <b>Farming</b>                                                                                                                     |
| Immune response: <i>STAT6(82)</i> , <i>RAD50(82)</i> , <i>IL13(82)</i> , <i>IL4(82)</i> , <i>CD14(81)</i>                          |
| Sphingolipid synthesis: <i>ORMDL1(82)</i>                                                                                          |
| <b>Pollution</b>                                                                                                                   |
| Immune response: <i>FOXP3(83)</i> , <i>IFN-g(83)</i> , <i>CTLA-4(84)</i> , <i>IL-10(84)</i> , <i>IL1-R2(84)</i> , <i>IFN-g(85)</i> |
| NO synthesis: <i>NOS2A(86)</i> , <i>NOS3(86)</i> , <i>iNOS(87)</i>                                                                 |
| Lipid Pathway: <i>ASCL3(72)</i>                                                                                                    |
| Xenobiotics metabolism: <i>CYPBRD1(84)</i>                                                                                         |
| Signaling: <i>CLK2(84)</i> , <i>MAP3K7(84)</i> , <i>PIK3CG(84)</i>                                                                 |
| DNA-binding: <i>ZNF445(84)</i> , <i>PHF20L1(84)</i> , <i>TRPS1(84)</i>                                                             |
| <b>Pet keeping</b>                                                                                                                 |
| Immune response: <i>CD14(88)</i>                                                                                                   |

*Epigenes identified by candidate gene approach are shown in red and those from genome-wide approach are shown in blue.*
